# Supplementary figures and images for: The transformation of the forest steppe in the lower Danube Plain of south-eastern Europe: 6000 years of vegetation and land use dynamic
Source: Copernicus journal article supplement (doi:10.5194/bg-2020-239), 2020-08-10

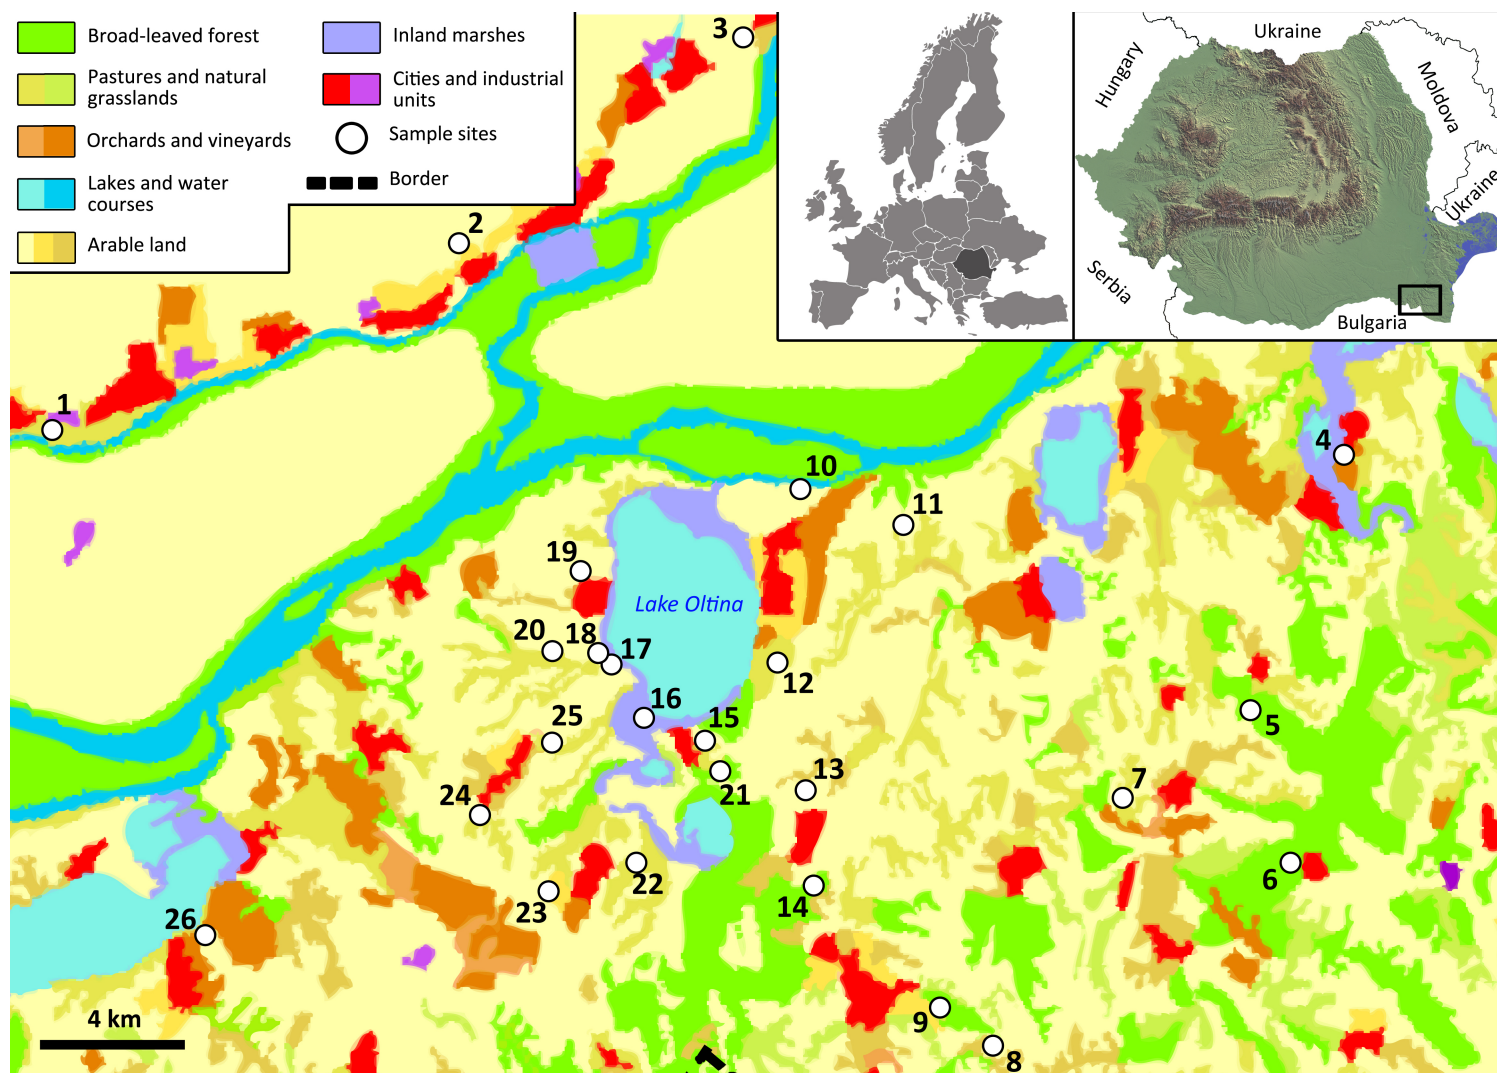

Supplement: Supplementary file 1 [file S1_Location of the study area and of surface samples.pdf › Suplement/S1_Location of the study area and of surface samples.pdf]
